# Supplementary material
Source: PubMed Central journal article supplement (PMC3869599)
Supplement: NIHMS529920-supplement-17.pdf [file NIHMS529920-supplement-17.pdf]

1134 **Supplement 1**

1135

1136

1137 Alignment of 11 thermostable proteins of *Nelumbo nucifera* Gaertn var. China Antique:1138 *Nelumbo* thermal proteins (soluble at 100°C, 10-min heat) were identified by mass

1139 spectrometry. The peptide fragments (&gt;3; ion score &gt;32) used as BLAST queries (NCBI;

1140 Camacho et al. 2009) against predicted *Nelumbo* proteome (Ming et al. 2013) are aligned1141 with the archaean *Methanocaldococcus jannaschii* (Mj; 85°C growth optimum) and those1142 of *Arabidopsis*, corn, grape, poplar, soybean using MUSCLE (Edgar, 2004), and

1143 visualized using ESPript (Gouet et al. 1999). Identities among the residues are shown in

1144 red, similarities in pink. Thirty thermoproteins of *Nelumbo* China Antique identified by

1145 MS, unaligned, are listed in Supplement 2.

1146

1147 Fig. S-1a **CuZn-SOD**; NNU\_0016761148 Fig. S-1b **1-CysPRX**; NNU\_0161721149 Fig. S-1c **CPN20**; NNU\_0105591150 Fig. S-1d **Vicilin**; NNU\_0071711151 Fig. S-1e **ENO-1**; NNU\_002362, 020386, 0210011152 Fig. S-1f **EF-1 $\alpha$** ; NNU\_024576, 024577, 0266731153 Fig. S-1g **HSP80**; NNU\_0102901154 Fig. S-1h **Met-Synthase**; NNU\_013651 (Mj alignment not shown)1155 Fig. S-1i **Dehydrin**; NNU\_006332, 013652, 0138511156 Fig. S-1j **PIMT**; NNU\_002938, 0042341157 Fig. S-1k **CPN60**; NNU\_011934, 023642

1158

1159

1160 **Supplement 2**

1161

1162

1163 Thirty thermostable proteins (soluble at 100°C, 10-min heat) of embryo axes of *Nelumbo*1164 *nucifera* Gaertn var. China Antique are identified by mass spectrometry (each having at1165 least 3+ fragments with ion scores 32-126). The 11 *Nelumbo* thermoprotein alignments1166 with plant species and *Methanocaldococcus jannaschii* (discussed in the text) are

1167 presented in Supplement 1.

1168

1169

1. Actin-12

1170

2. Aldose reductase

1171

3. Allergen Ara h1 clone

1172

4. nep1 Aspartic proteinase nepenthesin1

1173

5. yajl Chaperone protein yajl

1174

6. Embryonic protein DC-8

1175

7. Pistil-specific Extensin-like protein

1176

8. FBA Fructose bisphosphate aldolase (cytosol isozyme)

1177

9. 11S Globulin  $\beta$ 

1178

10. FA02 13S Globulin seed-storage protein1

1179

11. GluA1 Glutelin-type A1

1180

12. GluB1-A Glutelin-type B1

1181

13. GAPC Glyceraldehyde-3-phosphate dehydrogenase (cytosol)

1182

14. HSP18.2 18.2 kDa Class-1 Heat shock protein

1183

15. HSP70

1184

16. LEA Late embryogenesis abundant proteins Dc3, Dc8, D34

- 1185 17. LEGA Legumin A
- 1186 18. LEGB Legumin B
- 1187 19. LT65 Low temperature induced 65 kDa protein
- 1188 20. BIP5 Luminal-binding protein 5
- 1189 21. CMDH Malate dehydrogenase
- 1190 22. METE 5-Methyltetrahydropteroyl tri-glutamate homocysteine
- 1191 methyltransferase
- 1192 23. Early Nodulin-like protein 1 (At2g25060)
- 1193 24. Notum Protein notum homolog
- 1194 25. PECS-5 2.1 Pectinesterase2
- 1195 26. PCKR1 Peptidyl-prolyl cis-trans isomerase
- 1196 27. PER12 Peroxidase 12
- 1197 28. Phosphoglycerate kinase (cytosol)
- 1198 29. TCHH Tricohyalin
- 1199 30. Triose-phosphate isomerase
